# Supplementary material
Source: PubMed Central journal article supplement (PMC11382182)
Supplement: NIHMS1924520-supplement-1.pdf [file NIHMS1924520-supplement-1.pdf]

**Supporting information for “The Landau–Zener–Stückelberg–Majorana  
transition in the  $T_2 \ll T_1$  limit”**

Michael C. Boucher,<sup>1</sup> Peter Sun,<sup>1</sup> Ivan Keresztes,<sup>1</sup> Lee E. Harrell,<sup>2</sup> and John A. Marohn<sup>1</sup>

<sup>1</sup>*Department of Chemistry and Chemical Biology, Ithaca, New York 14853*

<sup>2</sup>*Department of Physics and Nuclear Engineering,  
U.S. Military Academy, West Point, New York 10996*

(Dated: June 26, 2023)

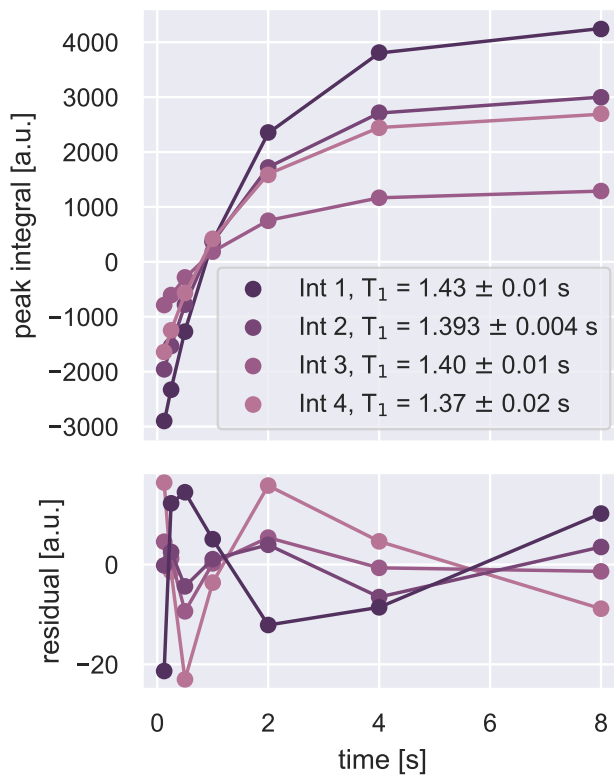

FIG. 1. Longitudinal relaxation time  $T_1$  of protons in 200k polystyrene in  $\text{CDCl}_3$  at  $-60^\circ\text{C}$  and 500 MHz, measured by inversion-recovery. In the legend, integrals “Int 1” to “Int 4” correspond to the NMR peaks in Fig. 5(top) of the main text.

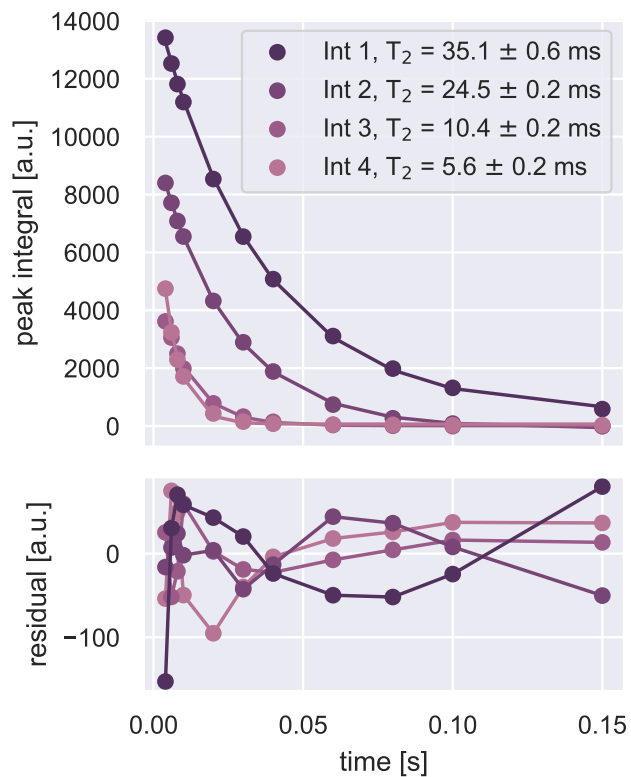

FIG. 2. Transverse relaxation time  $T_2$  of protons in 200k polystyrene in  $\text{CDCl}_3$  at  $-60^\circ\text{C}$  and 500 MHz, measured using the Carr-Purcell-Meiboom-Gill (CPMG) sequence. In the legend, integrals “Int 1” to “Int 4” correspond to the NMR peaks in Fig. 5(top) of the main text.

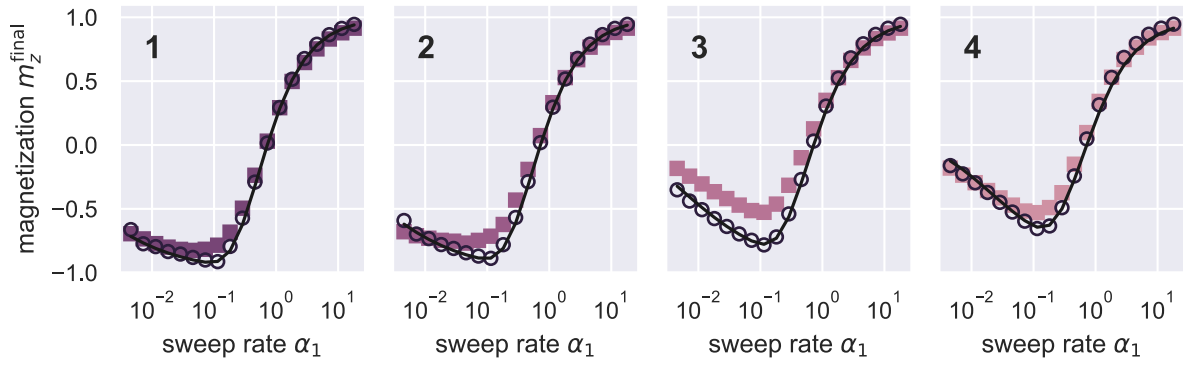

FIG. 3. Additional measurements of final magnetization after a sweep through resonance. The Fig. 5(bottom) experiment repeated with sweep rate =  $800 \text{ kHz s}^{-1}$  (unchanged) and sweep time  $2t_0 = 25 \text{ ms}$  (reduced 4-fold). Colored squares are experimental data, black circles are numerical simulations, and black lines are based on eq. 63.

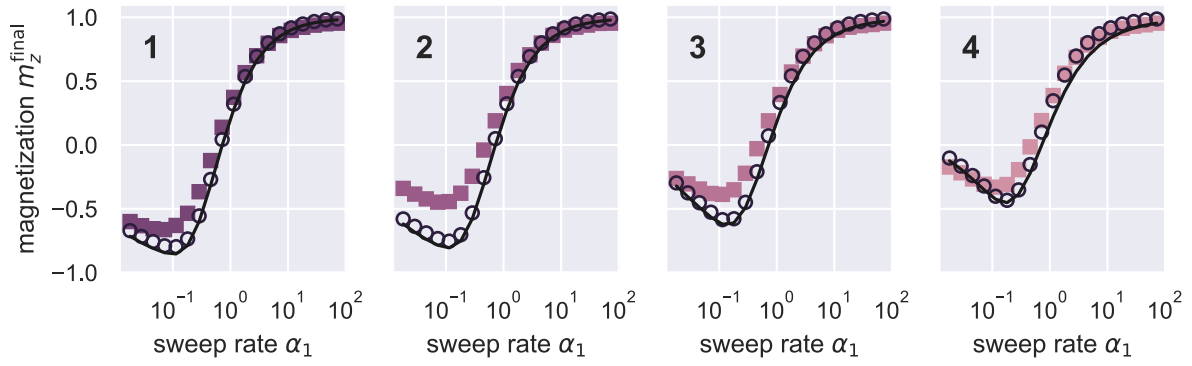

FIG. 4. Additional measurements of final magnetization after a sweep through resonance. The Fig. 5(bottom) experiment repeated with sweep rate =  $200 \text{ kHz s}^{-1}$  (reduced 4-fold) and sweep time  $2t_0 = 100 \text{ ms}$  (unchanged). Colored squares are experimental data, black circles are numerical simulations, and black lines are based on eq. 63.
